# Supplementary material for: Sustainable aquatic food systems: Multisectoral analysis of determinants of child nutrition in coastal Kenya
Source: Frontiers journal article supplement (doi:10.3389/fsufs.2023.1091339), 2023-02-16
Supplement: Table_2.DOCX [file Table_2.DOCX]

**Supplemental Table 2: Percent of children meeting dietary reference intake, by quartile**

| **Nutrient(N)** | **% Attainment of reference value specific for age per day** | | | | |
| --- | --- | --- | --- | --- | --- |
|  | **0-25%** | **26-50%** | **51-75%** | **76-100%** | **>100%** |
| Energy (Kcal) | 8.0 | 29.5 | 30.5 | 20.0 | 12.0 |
| Protein (g) | 0.5 | 7.1 | 9.4 | 11.2 | 71.8 |
| Fat (g) | 17.0 | 24.0 | 21.5 | 12.5 | 25.0 |
| Vit A (ug) | 39.4 | 17.6 | 11.2 | 13.5 | 18.2 |
| Vit B1 (mg) | 4.7 | 15.3 | 14.7 | 17.6 | 47.6 |
| Vit B2 (mg) | 4.1 | 12.9 | 18.2 | 21.8 | 42.9 |
| Vit B6 (mg) | 34.1 | 15.9 | 5.3 | 3.5 | 41.2 |
| Vit C (mg) | 46.5 | 29.4 | 15.3 | 4.7 | 4.1 |
| Vit E (eq ug) | 80.6 | 10.0 | 4.7 | 2.4 | 2.4 |
| Folic (mg) | 18.8 | 12.9 | 14.1 | 7.6 | 46.5 |
| Iron (mg) † | 23.0 | 31.0 | 24.5 | 14.0 | 7.5 |
| Zinc (mg) ‡ | 34.5 | 50.0 | 13.5 | 0.5 | 1.5 |
| Calcium (mg) | 15.3 | 37.6 | 20.6 | 14.0 | 12.4 |

Nutrient absorption was considered based on a predominantly plant-based diets of the households (FAO/WHO, 2001).

†Iron reference was set at 5% bioavailability.

‡Zinc reference was considered “low bioavailability.”
